# Supplementary material for: SARS-CoV-2 expresses a microRNA-like small RNA able to selectively repress host genes
Source: PubMed Central journal article supplement (PMC8719879; doi:10.1073/pnas.2116668118), 2021-12-13
Supplement: pnas.2116668118.sapp.pdf [file pnas.2116668118.sapp.pdf]

## Supplementary figures

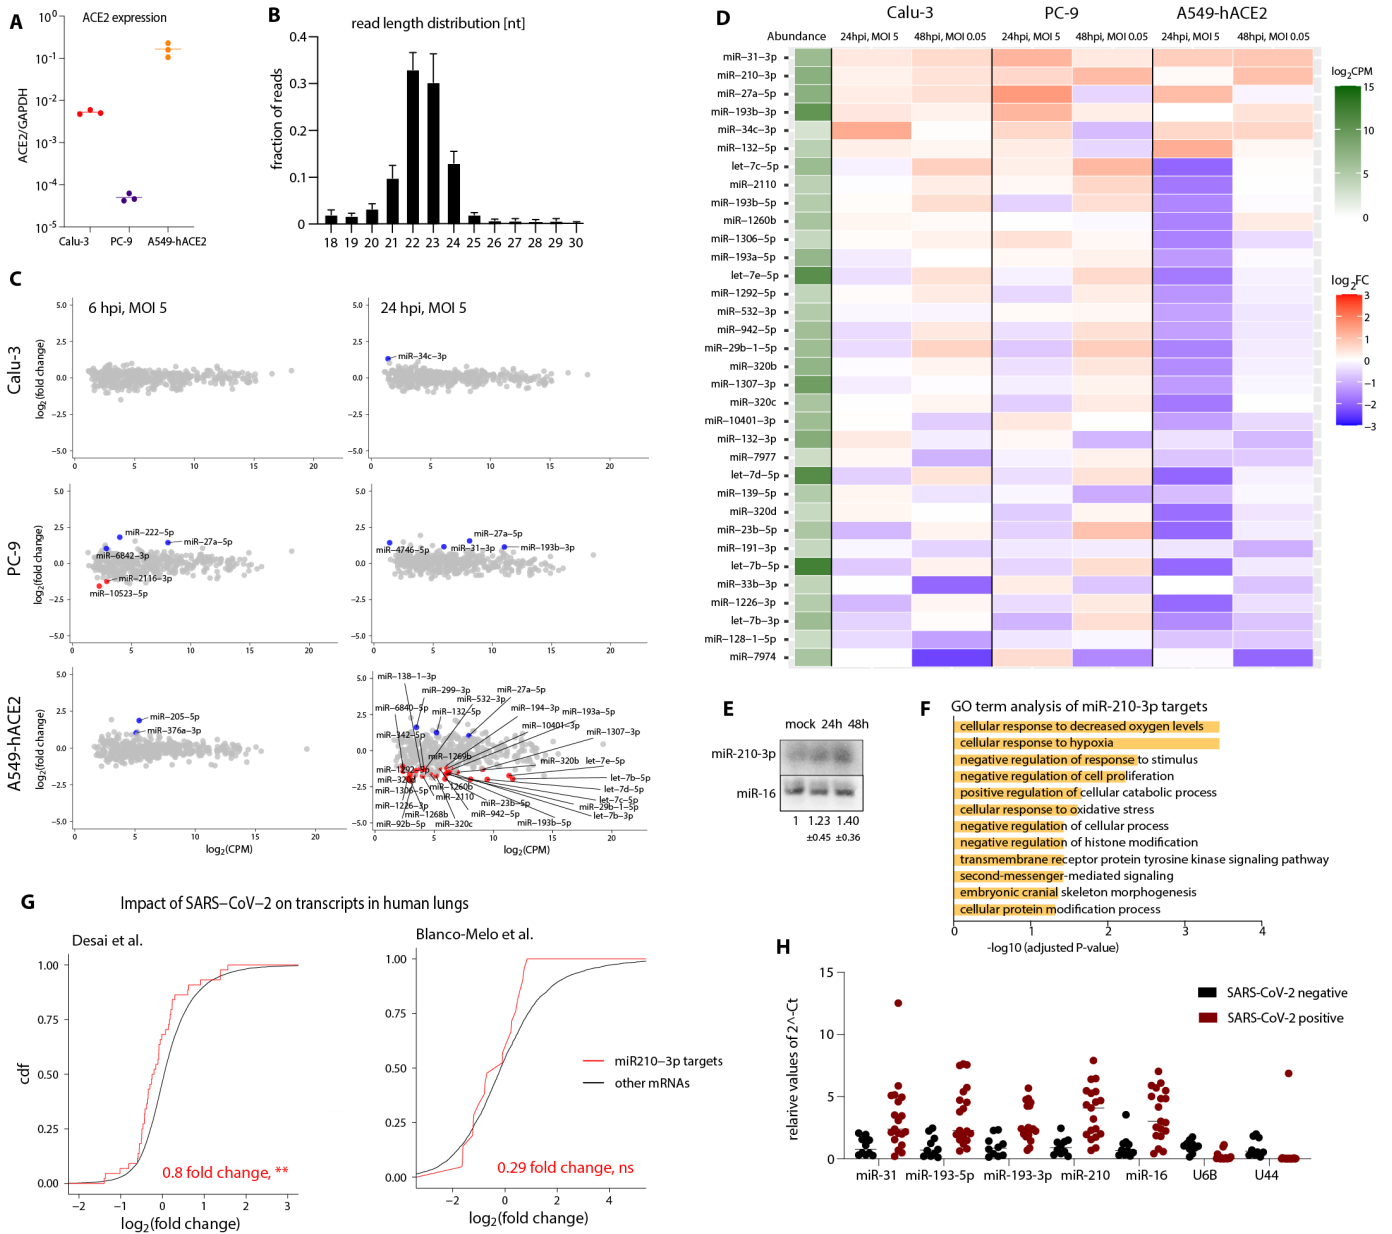

**Figure S1. SARS-CoV-2 infection has minimal impact on host miRNA levels.** **A)** Relative transcript levels of ACE2 in the three lung cell lines used in the study. **B)** A bar graph summarizing the sizes of obtained reads from all conditions sequenced. Error bars signify SD. **C)** Plots summarizing the fold-change in miRNA levels upon SARS-CoV-2 infection of various cell lines,  $n = 3$ . Colored dots denote miRNAs that significantly ( $p < 0.05$ ) changed (at least two-

fold). Significance was calculated using edgeR. **D)** A heat-map showing fold changes (FC) in miRNA levels after SARS-CoV-2 infection. The data are shown only for miRNAs that significantly changed (at least 2-fold) in any of the conditions. **E)** Northern blot showing that miR-210-3p slightly increases after infection with SARS-CoV-2 infection of Calu-3 cells at MOI 0.05, n = 5. **F)** GO term analyses for miR-210-3p targets suggest that this miRNA regulates responses to various stimuli. \*\* - p = 0.004, as calculated by Wilcoxon test. **G)** miR-210-3p targets (13) exhibit stronger downregulation than other host mRNAs after SARS-CoV-2 infection in human lungs (data replotted from (14, 15)). **H)** Host miRNAs may escape host shutoff induced by SARS-CoV-2 infection. hpi — hours post infection; MOI — multiplicity of infection; CPM — counts per million; cdf — cumulative distribution function.

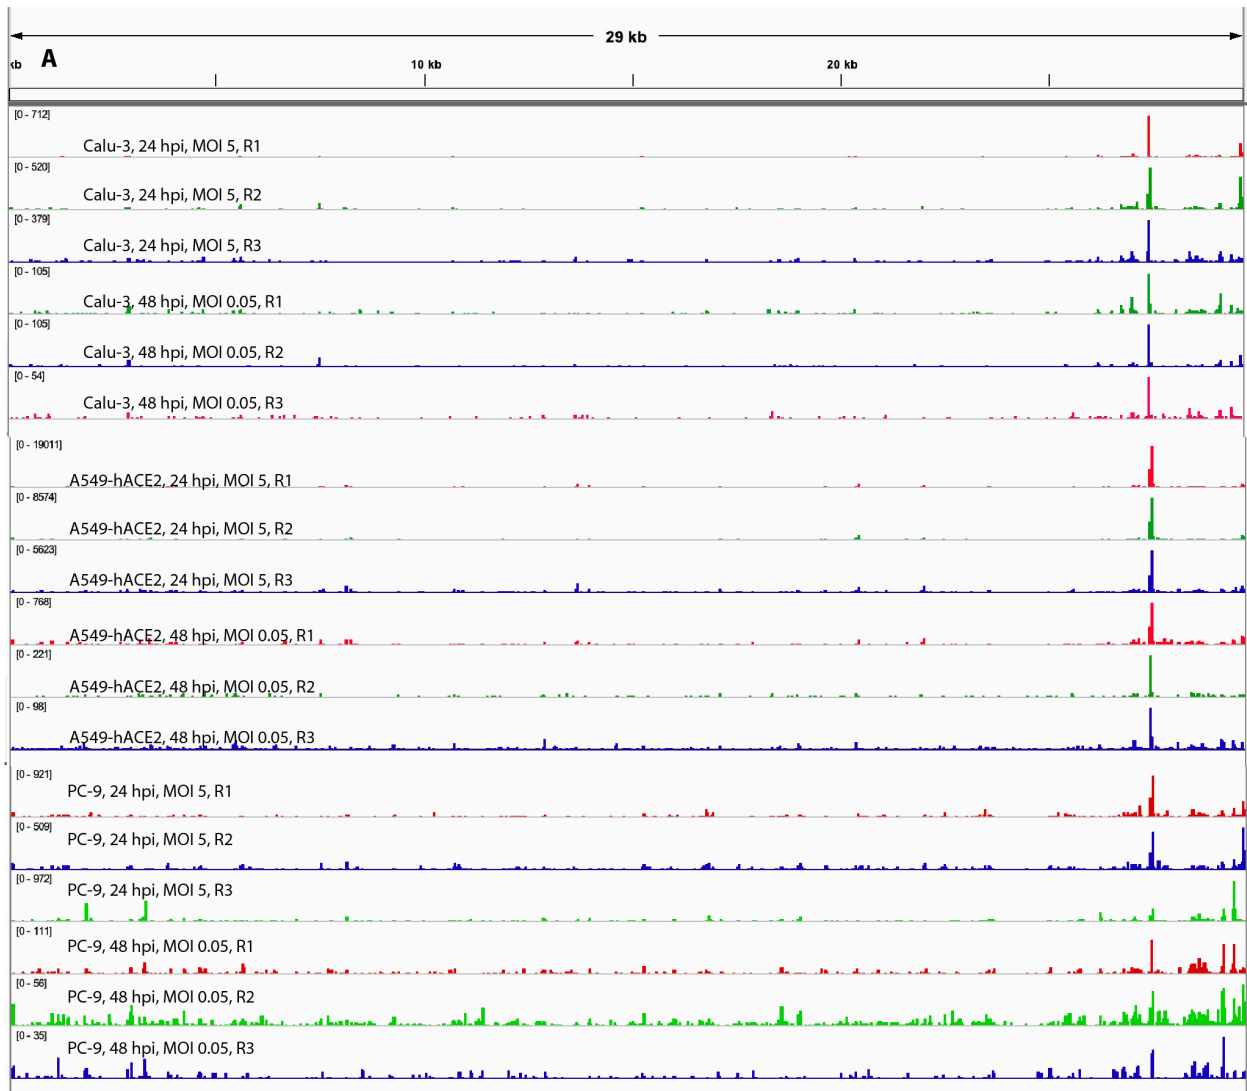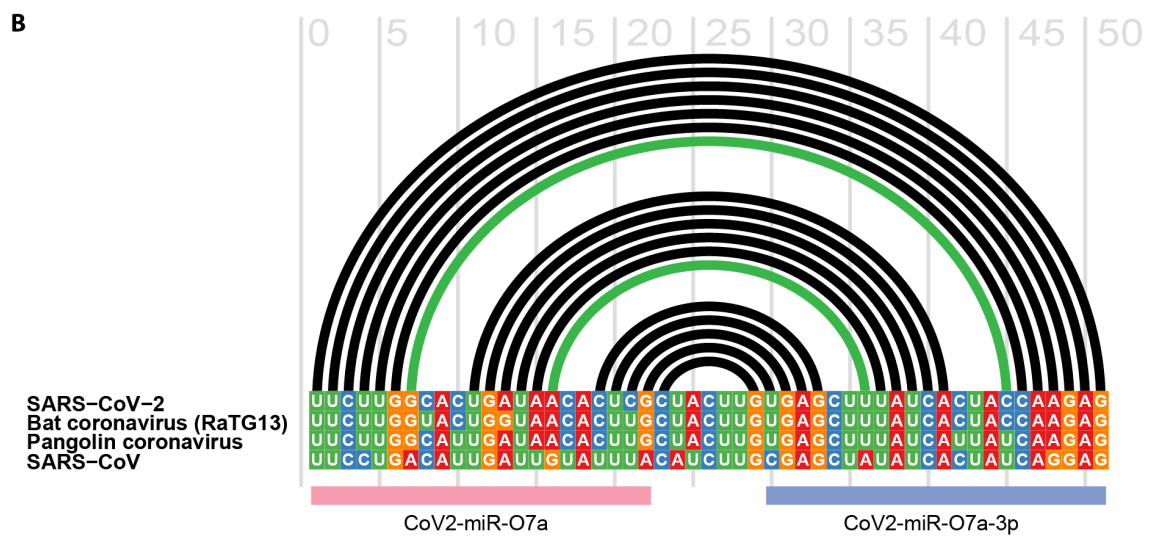

**Figure S2. SARS-CoV-2 expresses a small RNA derived from the ORF7a sequence. A)**

Sequencing tracks for all replicates are shown. **B)** Location of CoV2-miR-O7a and CoV2-miR-O7a-3p annotated on an alignment of coronavirus reference sequences. The hairpin base pairs are indicated by arcs above the sequence alignment with the two previously-identified covarying base pairs (21) indicated in green. Alignment and base pairs visualized using the program R-CHI (78).

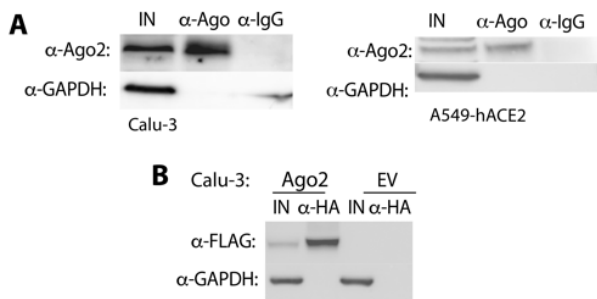

**Figure S3. Western blots confirming anti-Argonaute immunoprecipitation. A)** anti-pan Ago IPs detected with anti-Ago2 antibodies. **B)** anti-HA IP of FLAG-HA-tagged Ago2 detected with anti-FLAG antibodies.

|                                   |                                                   |
|-----------------------------------|---------------------------------------------------|
| miR-16 probe                      | CGCCAATATTTACGTGCTGCTA                            |
| miR-210-3p probe                  | TCAGCCGCTGTACACGCACAG                             |
| CoV2-miR-O7a probe                | CGAGTGTTATCAGTGCCAAGAA                            |
| CoV2-miR-O7a-3p probe             | TCTTGGTAGTGATAAAGCTCAC                            |
| RdRp_SARSr-F (qPCR primer)        | GTGARATGGTCATGTGTGGCGG                            |
| RdRp_SARSr-R (qPCR primer)        | CARATGTTAAASACACTATTAGCATA                        |
| RdRp_SARSr-P2 (qPCR probe)        | FAM-CAGGTGGAACCTCATCAGGAGATGC-BBQ                 |
| Synthetic CoV2-miR-O7a            | /5Phos/rUrUrCrUrUrGrGrCrArCrUrGrArUrArArCrArCrUrC |
| Passenger strand for CoV2-miR-O7a | /5Phos/rGrUrGrUrUrArUrCrArCrUrGrCrCrUrArGrArUrUrG |
| siContol                          | rArArGrCrGrArUrArCrCrUrCrGrUrGrUrGrUrGrArUrU      |
| T7_F (amplification)              | GAATTTAATACGACTCACTATAGGTTCTCCTCTAAACGAACATGAA    |
| T7_R (amplification)              | GAATGTACCTCTAACACACTCTTGGT                        |

|                |                                                                                                          |
|----------------|----------------------------------------------------------------------------------------------------------|
| WT (template)  | GGTTCTCCTCTAAACGAACATGAAAATTATTCTTTTCTTGGCACTGATAA<br>CACTCGCTACTTGTGAGCTTTATCACTACCAAGAGTGTGTTAGAGGTACA |
| m3p (template) | GGTTCTCCTCTAAACGAACATGAAAATTATTCTTTTCTTGGCACTGATAA<br>CACTCGCTACTTCTCTCCTTATAGACTACCAAGAGTGTGTTAGAGGTACA |
| m5p (template) | GGTTCTCCTCTAAACGAACATGAAAATTATTCTTTAGAACGCACTCTATT<br>CACTCGCTACTTGTGAGCTTTATCACTACCAAGAGTGTGTTAGAGGTACA |
| ACE2_F         | CAAGAGCAAACGGTTGAACAC                                                                                    |
| ACE2_R         | CCAGAGCCTCTCATTGTAGTCT                                                                                   |
| HSPG2_F        | TTGACCAACCCGATGACTTCA                                                                                    |
| HSPG2_R        | CGCCATAGGAGTCCACCTT                                                                                      |
| BATF2_F        | TCAGGAAGCAGCCTTAGCAC                                                                                     |
| BATF2_R        | AGGAGAAGGAGGAGCAGAGG                                                                                     |
| ZBTB5_F        | CCATTTTCAGATGTTACACCGGA                                                                                  |
| ZBTB5_R        | TCGCACTATCTTCCTGGTTATCA                                                                                  |
| BATF1_F        | GAGAACTGCGCTTACTAGGCT                                                                                    |
| BATF1_R        | GCCTCAAGTGGCATGAGTCT                                                                                     |
| PRKCH_F        | CGGGATCAACATCCCACACA                                                                                     |
| PRKCH_R        | ACCGCATTTACCCACAGTT                                                                                      |
| FAM13A_F       | TGCTCATGTACCCCAAGTCAG                                                                                    |
| FAM13A_R       | CTTGTCTCTCCCATGTGCGAAC                                                                                   |
| SUFU_F         | GCCTGAGTGATCTCTATGGTGA                                                                                   |
| SUFU_R         | TCTCTCTTCAGACGAAAGGTCAA                                                                                  |

**Table 2.** Oligonucleotides used in the study
